# Supplementary material for: Outside rules inside: the role of electron-active substituents in thiophene-based heterophenoquinones
Source: Royal Society of Chemistry journal article supplement (doi:10.1039/c4cp05748a), 2015-01-01
Supplement: c4cp05748a1.pdf [file c4cp05748a1.pdf]

### Supporting Information

Outside rules inside: the Role of the Electron-active Substituents in Thiophene-based Heterophenoquinones

L. Colella,<sup>[a][b]</sup> L. Brambilla,<sup>[a]</sup> V. Nardone,<sup>[c]</sup> E. Parisini,<sup>[c]</sup> C. Castiglioni,<sup>[a]</sup> and C. Bertarelli\*<sup>[a][c]</sup>

[a] Dipartimento di Chimica, Materiali e Ingegneria Chimica, Politecnico di Milano  
p.za Leonardo da Vinci 32, Milan, Italy

[b] INAF, Osservatorio Astronomico di Brera, via Bianchi 46, 23807 Merate, Italy

[c] Center for Nanoscience and Technology@PoliMi, Istituto Italiano di Tecnologia  
via Pascoli 70/3, Milan, Italy

## Table of Contents

1. UV and emission characterization
2. Crystallographic data

## 1. UV-Vis absorption and photoluminescence spectra of aromatic compounds

UV-vis absorption spectra were recorded on a Cary 5000 spectrophotometer (Varian), while photoluminescent spectra were recorded with a Jasco FP6600.

Photoluminescence spectra of the aromatic species were collected with very dilute solutions to avoid aggregation phenomena and minimize internal filter effects.

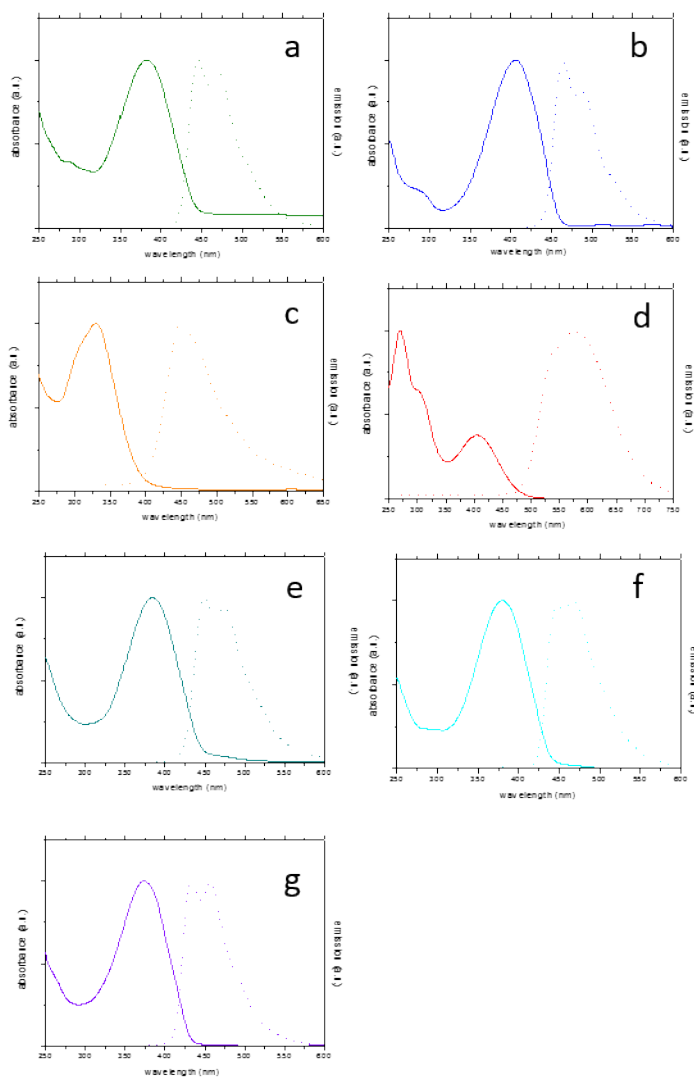

**Figure S01:** Normalized UV-Vis absorption and photoluminescence spectra of aromatic precursors in chloroform: (a) ABT, (b) AOO (c) AXX (d) ACO, (e) AMeOMeO, (f) AMeOCF<sub>3</sub>, (g) ACF<sub>3</sub>CF<sub>3</sub>.

| “Substituted core”<br>“Substituted wings” | $\lambda_{\text{abs}}$ (nm) | $\lambda^{\text{em}0-0}$ (nm) | Stokes shift |
|-------------------------------------------|-----------------------------|-------------------------------|--------------|
| <b>ABT</b>                                | 382                         | 445                           | 0.46         |
| <b>AOO</b>                                | 406                         | 464                           | 0.38         |
| <b>AXX</b>                                | 329                         | 448                           | 1.00         |
| <b>ACO</b>                                | 406                         | 540                           | 0.75         |
| <b>AMeOMeO</b>                            | 385                         | 449                           | 0.46         |
| <b>AMeOCF<sub>3</sub></b>                 | 379                         | 448                           | 0.50         |
| <b>ACF<sub>3</sub>CF<sub>3</sub></b>      | 372                         | 433                           | 0.47         |

**Table S01:** Absorption, emission and Stokes shift values of all aromatic compounds.

2. Crystallographic Information about **QOO**.

| <b>QOO</b>                             |                                                               |
|----------------------------------------|---------------------------------------------------------------|
| <b>Formula</b>                         | C <sub>46</sub> H <sub>64</sub> O <sub>4</sub> S <sub>2</sub> |
| <b>Fw</b>                              | 745,13                                                        |
| <b>Crystal system</b>                  | Monoclinic                                                    |
| <b>Space group</b>                     | P2 <sub>1</sub> /c                                            |
| <b>a (Å)</b>                           | 8.972 (2)                                                     |
| <b>b (Å)</b>                           | 17.266 (4)                                                    |
| <b>c (Å)</b>                           | 14.260 (5)                                                    |
| <b>α (deg)</b>                         | 90.00                                                         |
| <b>β (deg)</b>                         | 94.66 (3)                                                     |
| <b>γ (deg)</b>                         | 90.00                                                         |
| <b>V (Å<sup>3</sup>)</b>               | 2201.9 (12)                                                   |
| <b>T (K)</b>                           | 296 (2)                                                       |
| <b>Z</b>                               | 4                                                             |
| <b>F(000)</b>                          | 804                                                           |
| <b>P</b>                               | 1.121                                                         |
| <b>M</b>                               | 1.39                                                          |
| <b>crystalsize (mm<sup>3</sup>)</b>    | 0.30*0.08*0.08                                                |
| <b>θ<sub>max</sub> (deg)</b>           | 50.04                                                         |
| <b>Total reflections<br/>Collected</b> | 4958                                                          |
| <b>Rint</b>                            | 0.0578                                                        |
| <b>No. Unique</b>                      | 2115                                                          |
| <b>No. With I &gt; 2σ(I)</b>           | 1316                                                          |
| <b>Refined parameters</b>              | 243                                                           |
| <b>Restraints</b>                      | 0                                                             |
| <b>Final R indices [I &gt; 2σ(I)]</b>  | R <sub>1</sub> = 0.0844w R <sub>2</sub> = 0.2102              |
| <b>R indices (all data)</b>            | R <sub>1</sub> = 0.1343w R <sub>2</sub> = 0.2427              |
| <b>Δρ [eÅ<sup>-3</sup>]</b>            | (-) 0.274, 0.438                                              |

**Figure S02:** Crystallographic Information and structure refinement of **QOO**.
